# Supplementary material
Source: publisher site journal article supplement (https://www.spandidos-publications.com/2444/downloadSupplementary)
Supplement: Supplementary file 1 [file downloadSupplementary]

## Sheet: Supp table 4
Table SIV. Multivariate regression analysis.
	Coefficients	Standard Error	t Stat	P-value	Lower 95%	Upper 95%
Lines of therapy	-0.351907	0.171138	-2.05628	0.0470607	-0.69899	-0.00482305
Age	-0.028654	0.0281696	-1.01719	0.315849	-0.0857846	0.0284767
T stage	0.100384	0.282516	0.355321	0.724422	-0.472585	0.673352
Histology cc=1	0.270744	0.639491	0.423374	0.674541	-1.0262	1.56769
Sex m=1	0.844059	0.656083	1.28651	0.206477	-0.486539	2.17466
Fuhrman grade	0.15203	0.383515	0.396411	0.694142	-0.625775	0.929834
